# Supplementary material for: Carbon–carbon double bond position elucidation in fatty acids using ozone-coupled direct analysis in real time mass spectrometry
Source: Royal Society of Chemistry journal article supplement (doi:10.1039/c9an01059a), 2019-01-01
Supplement: c9an01059a1.pdf [file c9an01059a1.pdf]

(A) KPCA: FAME profile

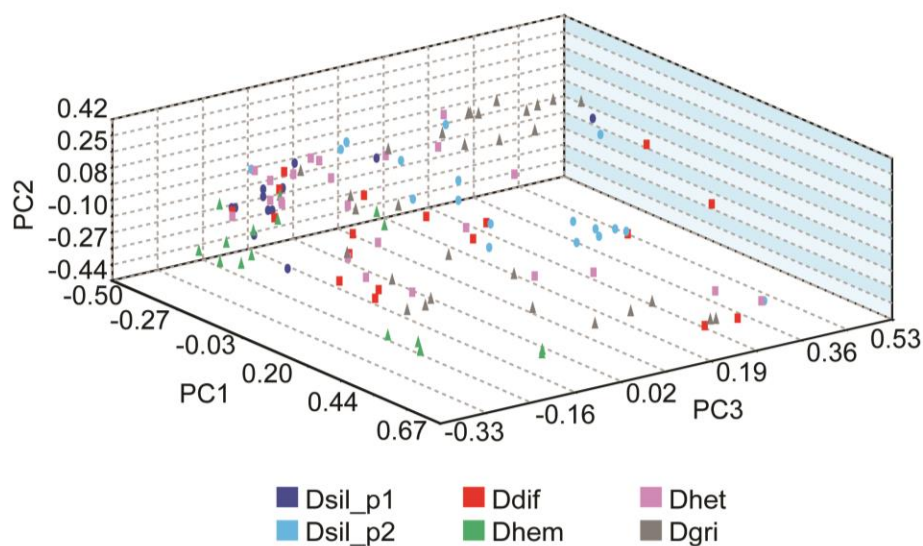

(B) KPCA: O<sub>3</sub> profile

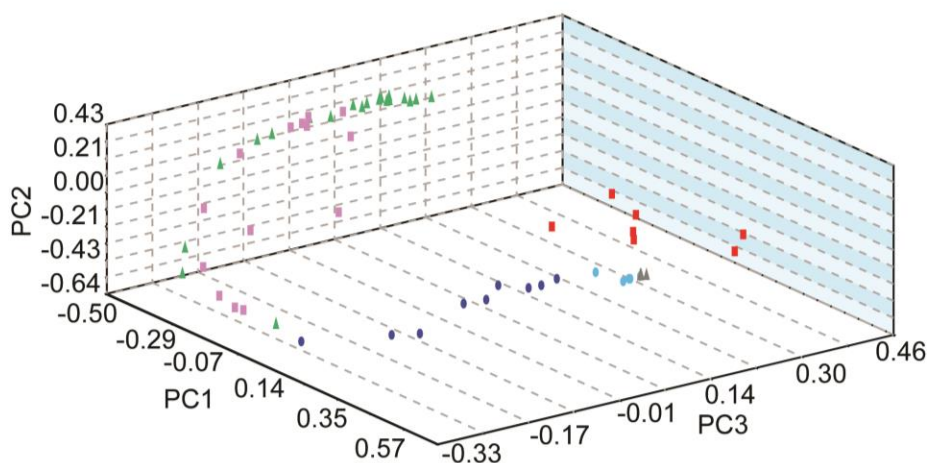

**Supplemental Figure 1.** Kernel principal component analysis (KPCA) using FAME or O<sub>3</sub>-FAME features. The KPCA model using features from non-O<sub>3</sub> spectra does not show robust clustering (LOOCV: 43%). By contrast, KPCA analysis with O<sub>3</sub> data shows clustering by species (LOOCV: 76%).
