# Supplementary material for: Carbon–carbon double bond position elucidation in fatty acids using ozone-coupled direct analysis in real time mass spectrometry
Source: Royal Society of Chemistry journal article supplement (doi:10.1039/c9an01059a), 2019-01-01
Supplement: c9an01059a3.pdf [file c9an01059a3.pdf]

**Supplemental Table 2.** Fatty acids identified by GCMS from esterified *Drosophila* extracts.

| Retention time (min.) |          | FA notation <sup>1</sup> | Diagnostic ion <i>m/z</i><br>M <sup>•</sup> |
|-----------------------|----------|--------------------------|---------------------------------------------|
| Extract               | Standard |                          |                                             |
| 17.9                  | 17.8     | 12:0                     | 74, 214                                     |
| 22.1                  | 22.0     | 14:1 (9)                 | 74, 240                                     |
| 22.3                  | 22.3     | 14:0                     | 74, 242                                     |
| 24.4                  | 24.4     | 15:0                     | 74, 256                                     |
| 26.0                  | 26.0     | 16:1 (9)                 | 74, 268                                     |
| 26.4                  | 26.4     | 16:0                     | 74, 270                                     |
| 27.9                  | 27.9     | 17:1 (10)                | 74, 282                                     |
| 28.3                  | 28.3     | 17:0                     | 74, 284                                     |
| 29.6                  | 29.5     | 18:2 (9,12)              | 74, 294                                     |
| 29.7                  | 29.6     | 18:1 (9)                 | 74, 296                                     |
| 30.2                  | 30.1     | 18:0                     | 74, 298                                     |
| 33.6                  | 33.5     | C20:0                    | 74, 326                                     |
| 36.8                  | 36.7     | C22:0                    | 74, 354                                     |

<sup>1</sup>Fatty acid (FA) notation denotes the carbon number followed by carbon-carbon double bond number with the site(s) of unsaturation in brackets. Double bond position was confirmed by GCMS (see Experimental).
